# Supplementary material for: Human papillomavirus in semen and the risk for male infertility: a systematic review and meta-analysis
Source: PubMed Central journal article supplement (PMC5679371; doi:10.1186/s12879-017-2812-z), 2017-11-09
Supplement: 12879_2017_2812_MOESM1_ESM.pdf [file 12879_2017_2812_MOESM1_ESM.pdf]

((("Papillomaviridae"[Mesh]) OR "HPV"[Title/Abstract]) OR "Human papillomavirus"[Title/Abstract]) AND ((((((("Semen"[Mesh]) OR "Spermatozoa"[Mesh]) OR "Semen Analysis"[Mesh]) OR "seminal"[Title/Abstract]) OR "Sperm"[Title/Abstract]) OR ((("Infertility, Male"[Mesh] ) OR ("infertility"[Title/Abstract] AND " men"[Title/Abstract])))
