# Supplementary material for: Human papillomavirus in semen and the risk for male infertility: a systematic review and meta-analysis
Source: PubMed Central journal article supplement (PMC5679371; doi:10.1186/s12879-017-2812-z), 2017-11-09

Meta-analysis estimates, given named study is omitted

| Lower CI Limit   ○ Estimate   | Upper CI Limit

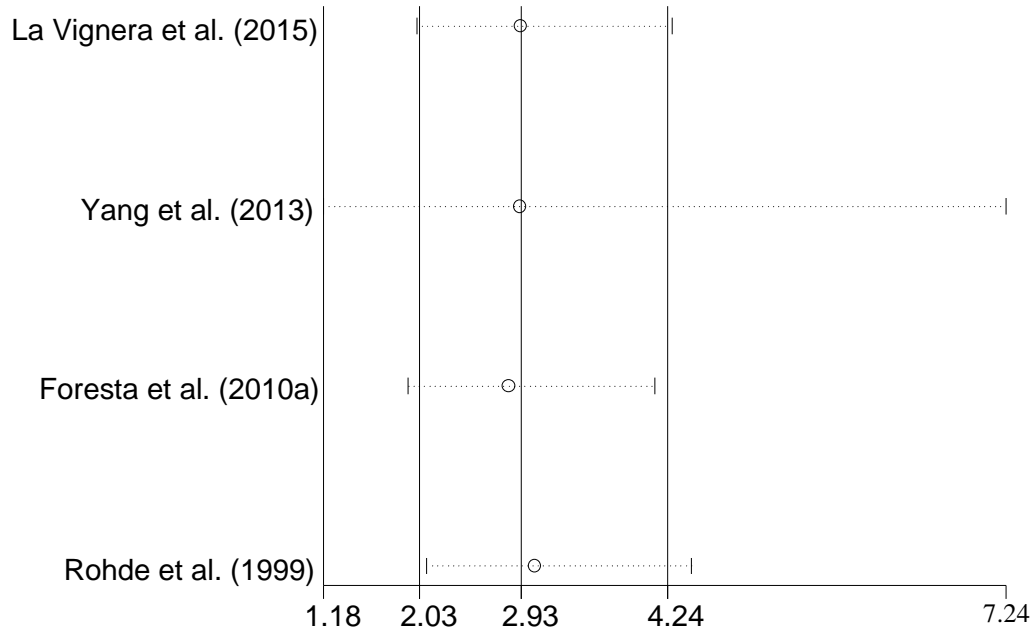

Supplement: 12879_2017_2812_MOESM3_ESM.pdf [file 12879_2017_2812_MOESM3_ESM.pdf]
